# Supplementary material
Source: PubMed Central journal article supplement (PMC3540947)
Supplement: neo1412_1223SD1.pdf [file neo1412_1223SD1.pdf]

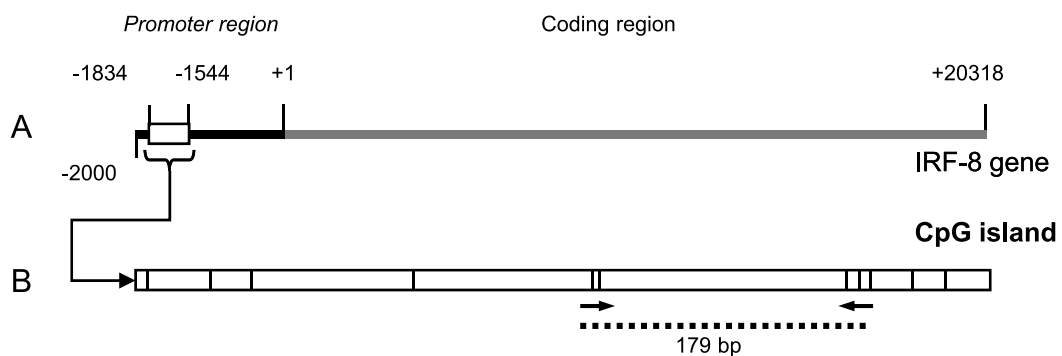

**Figure W1.** Analysis of a CpG island inside the promoter region of the mouse IRF-8 gene. (A) The promoter region of IRF-8 gene (MGI Identifier No. 96395) was analyzed from 2000 bp upstream the transcription initiation site (+1). The analyzed CpG island, detected by Methyl Primer Express software, is located at positions 1834 to 1544 bp before the initiation of transcription. The entire sequence, comprising the 2000-bp promoter region of IRF-8 gene and IRF-8 gene itself, is available online in the Nucleotide database of NCBI web site (<http://www.ncbi.nlm.nih.gov/sites/entrez>; Contig Sequence No. NT\_078575.6). Black line, IRF-8 promoter sequence; gray line, IRF-8 gene sequence; white box, CpG island. (B) Detail of the analyzed CpG island. Horizontal black arrows depict primers used for detection of methylated or unmethylated status of the CpG island by DNA methylation-specific PCR. Discontinued line shows the amplicon obtained by the assay for both methylation and unmethylation primers. Vertical black thin lines show CpG sequences detected inside the analyzed CpG island.

**Table W1.** Murine and Human Primers Used for qRT-PCR.

| Gene                 | Forward and Reverse Primers (5'→3')                  | NCBI Accession Number | Amplicon Size (Base Pairs) |
|----------------------|------------------------------------------------------|-----------------------|----------------------------|
| <i>IRF-8</i>         | TGATCGAACAGATCGACAGC<br>GCTGGTTCAGCTTGTCTCC          | NM_008320.3           | 187                        |
| <i>CCL5</i>          | ATATGGCTCGGACACCACTC<br>GTGACAAACAGACTGCAAGA         | NM_013653.3           | 123                        |
| <i>CCL21</i>         | GTGATGGAGGGGTCAGGA<br>GGGATGGGACAGCCTAAACT           | NM_011124.4           | 109                        |
| <i>CCL27</i>         | CTGCTGAGGAGGATTGTCCAC<br>CACGACAGCCTGGAGGTGA         | NM_011336             | 69                         |
| <i>CXCL1</i>         | GCTGGGATTCACCTCAAGAA<br>TCTCCGTTACTTGGGGACAC         | NM_008176.2           | 180                        |
| <i>CCR7</i>          | ACAGCGCCTCCAGAAGAACA<br>TGACGTCATAGGCAATGTTGAGCT     | NM_007719.2           | 345                        |
| <i>CCR10</i>         | GCCAGAGATGGGGACCAAGCC<br>TGGGTTGGAAGGCCCGACTGA       | NM_007721.4           | 143                        |
| <i>CCL19</i>         | GGCCTGCCTCAGATTATCTGCCAT<br>GGAAGGCTTTACAGATGTTCC    | NM_011888.2           | 173                        |
| <i>CX3CL1</i>        | ACGAAATGCGAAATCATGTGC<br>CTGTGTCGTCTCCAGGACAA        | NM_009142             | 120                        |
| <i>CXCR3</i>         | TACCTTGAGGTTAGTGAACGTCA<br>CGCTCTCGTTTTCCCATATAATC   | NM_009910             | 100                        |
| <i>CXCL12</i>        | GAGCCAAAGTCAAGCATCTG<br>CAATGCACACTTGTCTGTTG         | NM_013655.3           | 96                         |
| <i>CXCL10</i>        | CTCTCGCAAGGACGGTCCGC<br>TCCGATTACAGACATCTCTGCTCAT    | NM_021274.1           | 166                        |
| <i>CCR5</i>          | GCCAGAGGAGGTGAGACATCCGT<br>GGCAGGAGCTGAGCCGCAAT      | NM_009917.5           | 163                        |
| <i>CCL20</i>         | GACAGATGGCCGATGAAGCTT<br>TCACAGCCCTTTTCAACCAGT       | NM_016960.1           | 108                        |
| <i>IL-6</i>          | GAGGATACCACTCCCAACAGACC<br>AAGTGCATCATCGTTGTTTCATACA | NM_031168             | 141                        |
| <i>IL-27 p28</i>     | CTGTTGCTGCTACCCTTGCTT<br>CACTCCTGGCAATCGAGATTC       | NM_145636.1           | 177                        |
| <i>VEGF-A</i>        | AAAGGCTTCAGTGTGGTCTGAGAG<br>GGTTGGAACCGGCATCTTTATC   | NM_001025250          | 184                        |
| <i>VEGF-B</i>        | TTAGAGCTCAACCCAGACACCTGTA<br>CCTGTGAAGCAGGGCCATAA    | NM_011697.3           | 104                        |
| <i>VEGF-R2</i>       | GCCTGCTGTGGTCTCACTAC<br>CAAAGCATTGCCATTTCGAT         | NM_010612             | 114                        |
| <i>β-Actin</i>       | AGAGGAAATCGTGCGT<br>CAATAGTGATGACCTGGC               | NM_007393.3           | 138                        |
| <i>IRF-8</i> (human) | AGTAGCATGTATCCAGGACTGAT<br>CACAGCGTAACCTCGTCTTC      | NM_002163.2           | 196                        |
| <i>GAPDH</i> (human) | ATGGGGAAGGTGAAGGTCG<br>GGGGTCATTGATGGCAACAATA        | NM_002046.3           | 108                        |

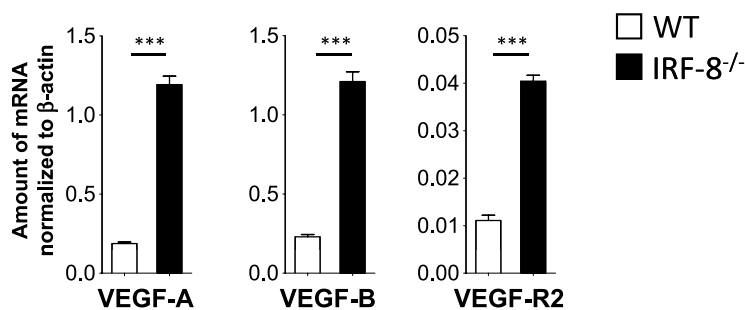

**Figure W2.** Expression of angiogenic factors in tumor bulks. Melanoma was excised from WT and IRF-8<sup>-/-</sup> mice ( $n = 3$ ) at medium stage (20-mm mean diameter), and mRNA was extracted. qRT-PCR for the indicated angiogenic markers was performed. Histograms represent the amount of mRNA expression normalized to  $\beta$ -actin for each experimental condition run in triplicate (mean values  $\pm$  SD). One representative experiment of two is shown.

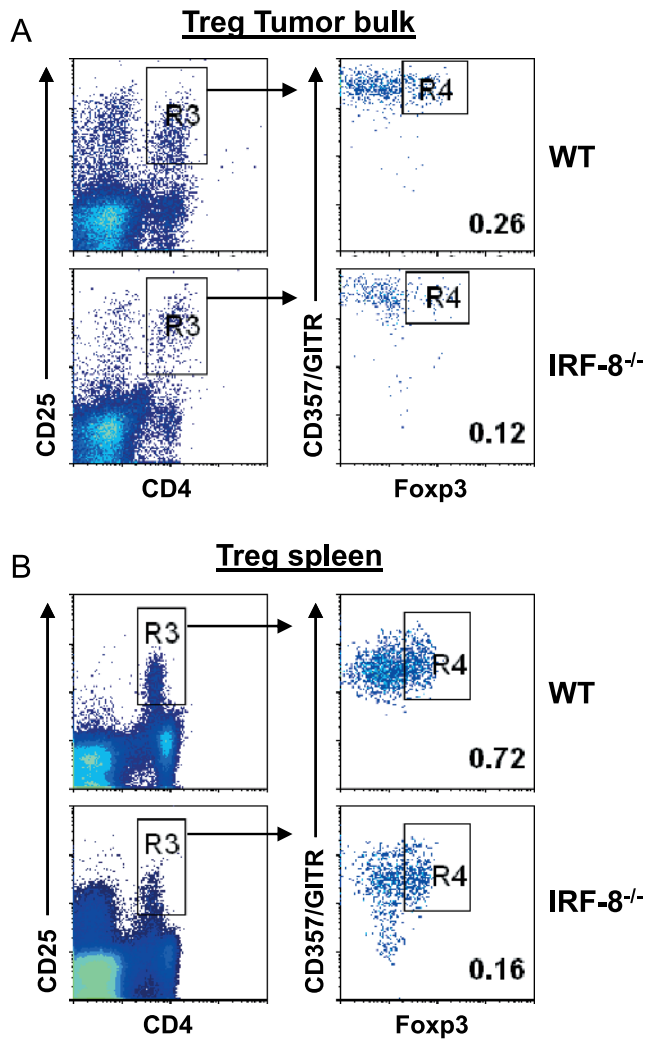

**Figure W3.** Frequency of Tregs in tumor and spleen of melanoma-bearing IRF-8<sup>-/-</sup> mice. Melanoma-bearing IRF-8<sup>-/-</sup> and WT mice were sacrificed at early tumor stage (12-mm mean diameter). FACS analysis of Tregs in tumor bulks (A) and spleens (B). Left-side dot plots show total live cell population; right-side plots show the population gated as indicated by the arrow. Values depicted refer to percent of positive cells over total live cells. One representative experiment of three is shown.

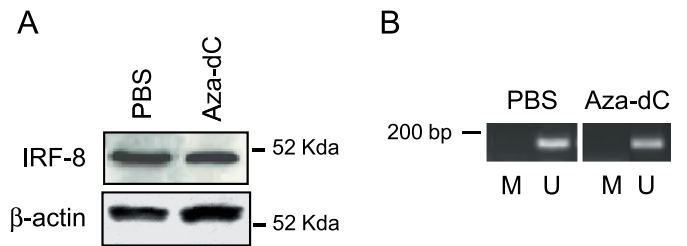

**Figure W4.** WT mice ( $n = 8$ ) were injected s.c. with B16-F10 melanoma cells. At day 17 post-injection, mice were injected i.p. with PBS or 5-Aza-dC. Twenty-four hours later, mice were sacrificed and melanoma was excised. (A) Western blot analysis of intratumoral IRF-8 expression in WT-melanoma lesions. Numbers represent the size of protein weight markers. One representative experiment of two is shown. (B) DNA methylation assay specific for IRF-8 promoter region in WT-melanoma lesions at the indicated experimental conditions. M, methylation primers; U, unmethylation primers. Numbers represent length of DNA molecular weight markers.

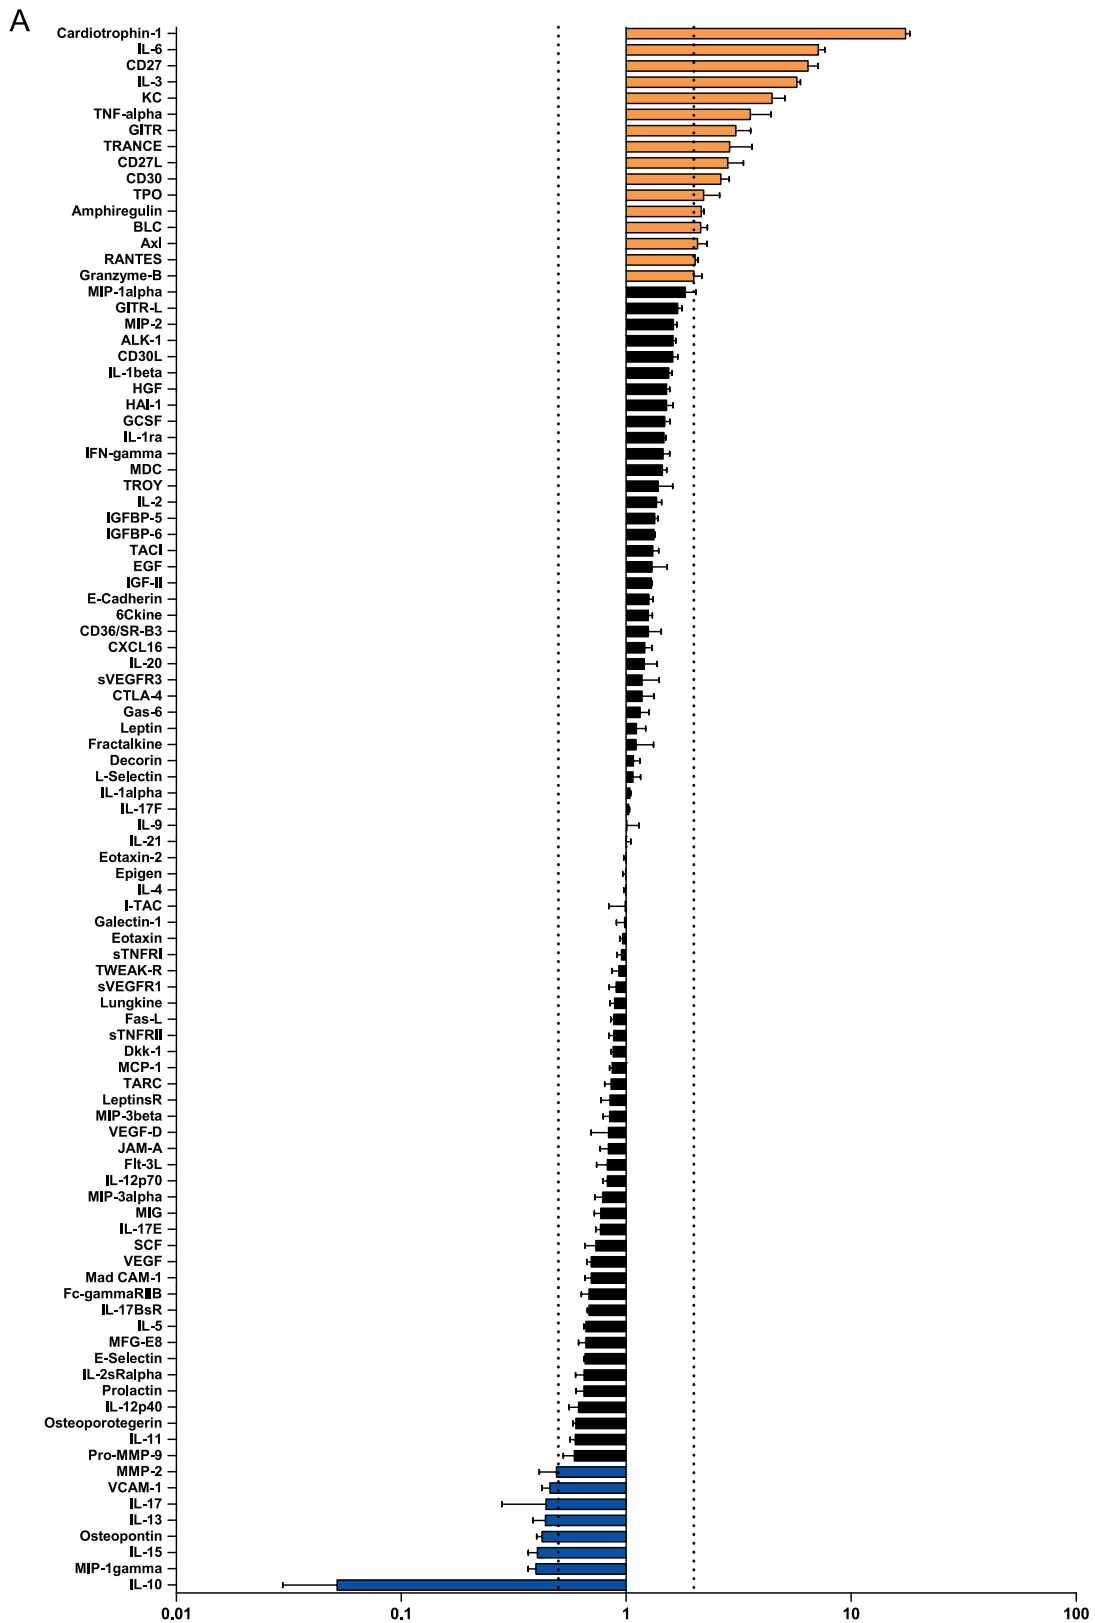

**Figure W5.** Differential cytokine release by immune cells from melanoma-bearing or naïve WT *versus* IRF-8<sup>-/-</sup> mice. Cytokines from supernatants of spleen cell-B16 melanoma co-cultures (24 hours) were measured using a protein array kit and quantified using ImageJ software. (A) Full array of differentially expressed cytokines in spleen cells of melanoma-bearing WT *versus* IRF-8<sup>-/-</sup> mice. Orange, cytokines upregulated in WT cells; blue, cytokines upregulated in IRF-8<sup>-/-</sup> cells; black, cytokines not differentially expressed. Analysis of protein expression of WT-upregulated cytokines (B) and of IRF-8-upregulated cytokines (C) in tumor-bearing and naïve mice. Values are expressed in arbitrary units. One experiment of two is shown.

**B**

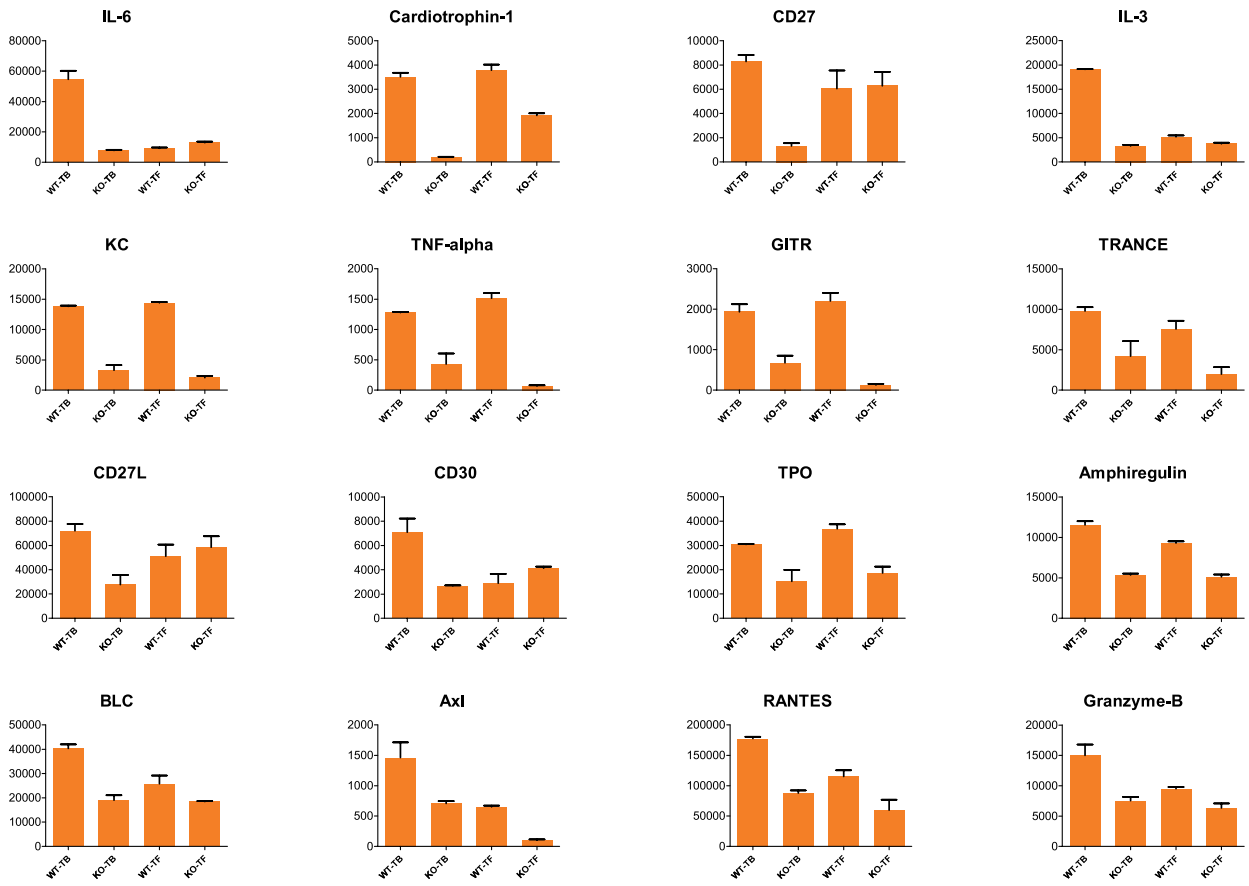

**C**

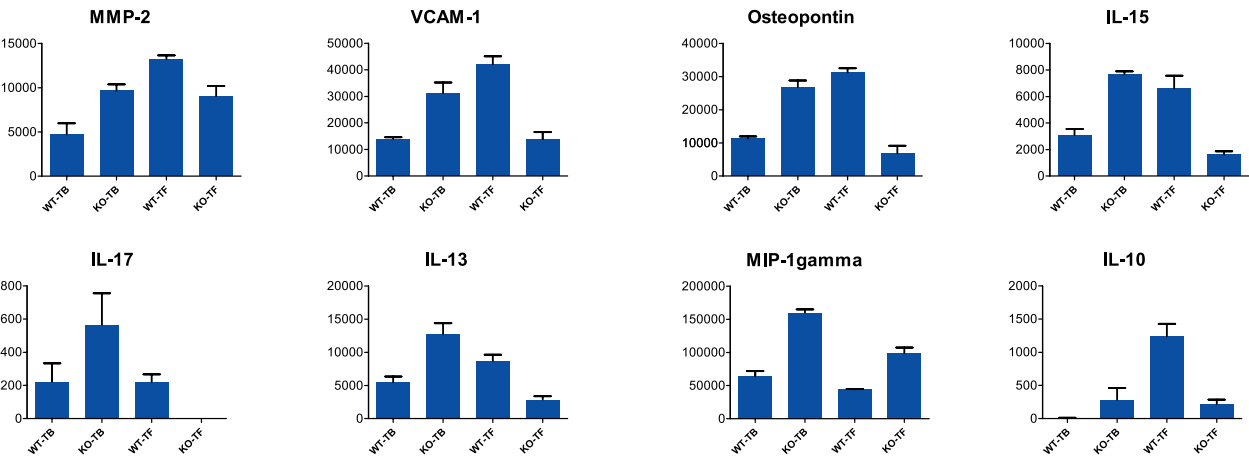

**Figure W5.** (continued).
